# Supplementary material for: Uncovering the biogeographic pattern of the widespread nematode-trapping fungi Arthrobotrys oligospora: watershed is the key
Source: Front Microbiol. 2023 Apr 20;14:1152751. doi: 10.3389/fmicb.2023.1152751 (PMC10156993; doi:10.3389/fmicb.2023.1152751)
Supplement: Supplementary Table 2 — The GenBank accession numbers of the isolates included in this study. [file Table_2.XLSX]

## Sheet: Table S2
Table S2. The GenBank accession numbers of the isolates included in this study.
Species	Id	ITS	TUB	RPB2	TEF	Watershed	Clade	Id in the tree
Arthrobotrys musiformis	YL435	OQ244107	OQ266933	OQ267084	OQ267235			YL435 A musiformis ITS'
Arthrobotrys vermicola	MA95	OQ244108	OQ266934	OQ267085	OQ267236			MA95 A vermicola ITS'
Arthrobotrys oligospora	HA666	OQ244109	OQ266935	OQ267086	OQ267237	P	4	HA666__BE__P__y__T
	FA410	OQ244110	OQ266936	OQ267087	OQ267238	L	5	FA410__IE__L__y__T
	FA426	OQ244111	OQ266937	OQ267088	OQ267239	L	3	FA426__IS__L__y__T
	FA469	OQ244112	OQ266938	OQ267089	OQ267240	L	3	FA469__IM__L__y__T
	FA482	OQ244113	OQ266939	OQ267090	OQ267241	L	1	FA482__IX__L__y__T
	FA490	OQ244114	OQ266940	OQ267091	OQ267242	J	3	FA490__IQ__J__n__T
	FA492	OQ244115	OQ266941	OQ267092	OQ267243	L	3	FA492__II__L__n__T
	FA509	OQ244116	OQ266942	OQ267093	OQ267244	L	3	FA509__CT__L__y__T
	FA519	OQ244117	OQ266943	OQ267094	OQ267245	L	3	FA519__IL__L__n__T
	FA579	OQ244118	OQ266944	OQ267095	OQ267246	L	3	FA579__IU__L__y__T
	FA585	OQ244119	OQ266945	OQ267096	OQ267247	L	3	FA585__CH__L__y__T
	YB117	OQ244120	OQ266946	OQ267097	OQ267248	J	1	YB117__GB__J__y__T
	YB147	OQ244121	OQ266947	OQ267098	OQ267249	J	1	YB147__GK__J__y__T
	FA066	OQ244122	OQ266948	OQ267099	OQ267250	L	3	FA066__CJ__L__y__T
	FA680	OQ244123	OQ266949	OQ267100	OQ267251	L	3	FA680__IW__L__y__T
	FA681	OQ244124	OQ266950	OQ267101	OQ267252	L	1	FA681__IG__L__n__T
	FA716	OQ244125	OQ266951	OQ267102	OQ267253	L	1	FA716__IT__L__y__T
	MA110	OQ244126	OQ266952	OQ267103	OQ267254	J	1	MA110__HU__J__y__T
	FA744	OQ244127	OQ266953	OQ267104	OQ267255	L	1	FA744__IW__L__y__T
	FA747	OQ244128	OQ266954	OQ267105	OQ267256	L	2	FA747__IC__L__y__T
	JA071	OQ244129	OQ266955	OQ267106	OQ267257	R	2	JA071__FF__R__n__T
	YB040	OQ244130	OQ266956	OQ267107	OQ267258	P	4	YB040__GH__P__y__T
	FA809	OQ244131	OQ266957	OQ267108	OQ267259	J	1	FA809__IN__J__y__T
	FA811	OQ244132	OQ266958	OQ267109	OQ267260	R	2	FA811__CU__R__y__T
	FA816	OQ244133	OQ266959	OQ267110	OQ267261	L	3	FA816__IK__L__n__T
	JA052	OQ244134	OQ266960	OQ267111	OQ267262	R	2	JA052__FG__R__y__T
	HA394	OQ244135	OQ266961	OQ267112	OQ267263	N	5	HA394__EN__N__n__T
	HA103	OQ244136	OQ266962	OQ267113	OQ267264	P	4	HA103__AX__P__y__T
	HA128	OQ244137	OQ266963	OQ267114	OQ267265	R	1	HA128__BH__R__y__T
	HA169	OQ244138	OQ266964	OQ267115	OQ267266	N	5	HA169__EK__N__n__T
	MA266	OQ244139	OQ266965	OQ267116	OQ267267	L	3	MA266__DA__L__y__T
	JA006	OQ244140	OQ266966	OQ267117	OQ267268	R	2	JA006__EX__R__y__T
	HA260	OQ244141	OQ266967	OQ267118	OQ267269	I	5	HA260__EG__I__y__T
	WA207	OQ244142	OQ266968	OQ267119	OQ267270	J	1	WA207__GL__J__y__T
	HA298	OQ244143	OQ266969	OQ267120	OQ267271	L	1	HA298__EP__L__y__T
	LA153	OQ244144	OQ266970	OQ267121	OQ267272	L	3	LA153__AA__L__y__T
	HA305	OQ244145	OQ266971	OQ267122	OQ267273	P	2	HA305__AW__P__y__T
	HA307	OQ244146	OQ266972	OQ267123	OQ267274	P	1	HA307__BF__P__y__T
	HA322	OQ244147	OQ266973	OQ267124	OQ267275	N	5	HA322__EN__N__n__T
	HA332	OQ244148	OQ266974	OQ267125	OQ267276	N	5	HA332__EN__N__n__T
	HA370	OQ244149	OQ266975	OQ267126	OQ267277	R	2	HA370__BG__R__y__T
	HA393	OQ244150	OQ266976	OQ267127	OQ267278	R	2	HA393__BG__R__y__T
	FA868	OQ244151	OQ266977	OQ267128	OQ267279	L	3	FA868__CK__L__y__T
	HA471	OQ244152	OQ266978	OQ267129	OQ267280	L	2	HA471__EQ__L__n__T
	HA611	OQ244153	OQ266979	OQ267130	OQ267281	N	5	HA611__EI__N__n__T
	FA115	OQ244154	OQ266980	OQ267131	OQ267282	R	2	FA115__CW__R__y__T
	HA678	OQ244155	OQ266981	OQ267132	OQ267283	P	4	HA678__BA__P__y__T
	MA177	OQ244156	OQ266982	OQ267133	OQ267284	L	3	MA177__DB__L__y__T
	JA107	OQ244157	OQ266983	OQ267134	OQ267285	R	2	JA107__EU__R__y__T
	JA119	OQ244158	OQ266984	OQ267135	OQ267286	R	2	JA119__FA__R__y__T
	JA026	OQ244159	OQ266985	OQ267136	OQ267287	R	4	JA026__FH__R__n__T
	JA027	OQ244160	OQ266986	OQ267137	OQ267288	R	2	JA027__EW__R__y__T
	FA821	OQ244161	OQ266987	OQ267138	OQ267289	L	3	FA821__II__L__n__T
	HA233	OQ244162	OQ266988	OQ267139	OQ267290	N	5	HA233__EJ__N__n__T
	FA803	OQ244163	OQ266989	OQ267140	OQ267291	L	3	FA803__IV__L__y__T
	MA169	OQ244164	OQ266990	OQ267141	OQ267292	I	5	MA169__DX__I__y__T
	JA092	OQ244165	OQ266991	OQ267142	OQ267293	R	2	JA092__EW__R__y__T
	JA097	OQ244166	OQ266992	OQ267143	OQ267294	R	3	JA097__FK__R__y__T
	JA099	OQ244167	OQ266993	OQ267144	OQ267295	R	2	JA099__FK__R__y__T
	LA010	OQ244168	OQ266994	OQ267145	OQ267296	L	3	LA010__AP__L__y__T
	LA109	OQ244169	OQ266995	OQ267146	OQ267297	N	2	LA109__AK__N__y__T
	LA110	OQ244170	OQ266996	OQ267147	OQ267298	L	3	LA110__AF__L__y__T
	LA112	OQ244171	OQ266997	OQ267148	OQ267299	L	3	LA112__AB__L__y__T
	XA096	OQ244172	OQ266998	OQ267149	OQ267300	J	1	XA096__FQ__J__y__T
	LA117	OQ244173	OQ266999	OQ267150	OQ267301	R	1	LA117__AU__R__n__T
	WA091	OQ244174	OQ267000	OQ267151	OQ267302	J	1	WA091__HD__J__y__T
	LA128	OQ244175	OQ267001	OQ267152	OQ267303	N	1	LA128__AL__N__y__T
	LA145	OQ244176	OQ267002	OQ267153	OQ267304	L	2	LA145__AC__L__y__T
	LA151	OQ244177	OQ267003	OQ267154	OQ267305	N	5	LA151 __AM__N__y__T
	HA300	OQ244178	OQ267004	OQ267155	OQ267306	N	5	HA300__EN__N__n__T
	LA172	OQ244179	OQ267005	OQ267156	OQ267307	N	3	LA172 __AM__N__y__T
	LA173	OQ244180	OQ267006	OQ267157	OQ267308	L	3	LA173__AI__L__y__T
	LA191	OQ244181	OQ267007	OQ267158	OQ267309	L	2	LA191__AE__L__y__T
	LA038	OQ244182	OQ267008	OQ267159	OQ267310	L	3	LA038__AQ__L__y__T
	LA065	OQ244183	OQ267009	OQ267160	OQ267311	L	1	LA065__AD__L__y__T
	FA721	OQ244184	OQ267010	OQ267161	OQ267312	L	3	FA721__IH__L__y__T
	MA117	OQ244185	OQ267011	OQ267162	OQ267313	J	3	MA117__HK__J__y__T
	XA170	OQ244186	OQ267012	OQ267163	OQ267314	J	1	XA170__FP__J__n__T
	JA084	OQ244187	OQ267013	OQ267164	OQ267315	R	2	JA084__EX__R__y__T
	JA101	OQ244188	OQ267014	OQ267165	OQ267316	R	2	JA101__EY__R__n__T
	MA184	OQ244189	OQ267015	OQ267166	OQ267317	J	1	MA184__HS__J__n__T
	MA187	OQ244190	OQ267016	OQ267167	OQ267318	I	5	MA187__DW__I__y__T
	WA203	OQ244191	OQ267017	OQ267168	OQ267319	J	1	WA203__GW__J__y__T
	MA204	OQ244192	OQ267018	OQ267169	OQ267320	L	2	MA204__DD__L__n__T
	MA232	OQ244193	OQ267019	OQ267170	OQ267321	L	2	MA232__DD__L__n__T
	HA203	OQ244194	OQ267020	OQ267171	OQ267322	I	5	HA203__EF__I__y__T
	MA071	OQ244195	OQ267021	OQ267172	OQ267323	J	3	MA071__HT__J__n__T
	MA094	OQ244196	OQ267022	OQ267173	OQ267324	J	1	MA094__HV__J__n__T
	WA012	OQ244197	OQ267023	OQ267174	OQ267325	J	1	WA012__GQ__J__n__T
	WA121	OQ244198	OQ267024	OQ267175	OQ267326	J	5	WA121__GV__J__y__T
	WA141	OQ244199	OQ267025	OQ267176	OQ267327	J	3	WA141__HC__J__y__T
	WA165	OQ244200	OQ267026	OQ267177	OQ267328	J	5	WA165__GZ__J__n__T
	WA200	OQ244201	OQ267027	OQ267178	OQ267329	J	5	WA200__GS__J__y__T
	MA019	OQ244202	OQ267028	OQ267179	OQ267330	N	5	MA019__DO__N__n__T
	HA264	OQ244203	OQ267029	OQ267180	OQ267331	N	5	HA264__EH__N__n__T
	WA208	OQ244204	OQ267030	OQ267181	OQ267332	J	2	WA208__GM__J__y__T
	WA219	OQ244205	OQ267031	OQ267182	OQ267333	J	5	WA219__GY__J__y__T
	WA049	OQ244206	OQ267032	OQ267183	OQ267334	J	1	WA049__GS__J__y__T
	WA068	OQ244207	OQ267033	OQ267184	OQ267335	J	2	WA068__HE__J__n__T
	ZA248	OQ244208	OQ267034	OQ267185	OQ267336	R	2	ZA248__BR__R__n__T
	WA071	OQ244209	OQ267035	OQ267186	OQ267337	J	3	WA071__HG__J__n__T
	LA121	OQ244210	OQ267036	OQ267187	OQ267338	R	2	LA121__AU__R__n__T
	XA109	OQ244211	OQ267037	OQ267188	OQ267339	J	1	XA109__FS__J__y__T
	XA123	OQ244212	OQ267038	OQ267189	OQ267340	J	1	XA123__FV__J__y__T
	XA131	OQ244213	OQ267039	OQ267190	OQ267341	J	1	XA131__FL__J__y__T
	XA167	OQ244214	OQ267040	OQ267191	OQ267342	J	3	XA167__FR__J__y__T
	XA169	OQ244215	OQ267041	OQ267192	OQ267343	J	1	XA169__FT__J__n__T
	MA135	OQ244216	OQ267042	OQ267193	OQ267344	L	3	MA135__HI__L__y__T
	XA176	OQ244217	OQ267043	OQ267194	OQ267345	J	2	XA176__FU__J__y__T
	XA177	OQ244218	OQ267044	OQ267195	OQ267346	J	1	XA177__FX__J__y__T
	XA179	OQ248169	OQ267045	OQ267196	OQ267347	J	1	XA179__FR__J__y__T
	XA019	OQ248170	OQ267046	OQ267197	OQ267348	J	3	XA019__FW__J__y__T
	XA201	OQ248171	OQ267047	OQ267198	OQ267349	J	1	XA201__FR__J__y__T
	XA024	OQ248172	OQ267048	OQ267199	OQ267350	J	1	XA024__FW__J__y__T
	XA026	OQ248173	OQ267049	OQ267200	OQ267351	J	1	XA026__FY__J__y__T
	XA047	OQ248174	OQ267050	OQ267201	OQ267352	J	1	XA047__FS__J__y__T
	XA005	OQ248175	OQ267051	OQ267202	OQ267353	J	3	XA005__FW__J__y__T
	LA114	OQ248176	OQ267052	OQ267203	OQ267354	L	3	LA114__AO__L__y__T
	YB107	OQ248177	OQ267053	OQ267204	OQ267355	J	1	YB107__GA__J__y__T
	FA625	OQ248178	OQ267054	OQ267205	OQ267356	L	3	FA625__CN__L__y__T
	YB123	OQ248179	OQ267055	OQ267206	OQ267357	J	1	YB123__GD__J__y__T
	YB129	OQ248180	OQ267056	OQ267207	OQ267358	J	3	YB129__GC__J__y__T
	YB133	OQ248181	OQ267057	OQ267208	OQ267359	P	4	YB133__GF__P__y__T
	YB142	OQ248182	OQ267058	OQ267209	OQ267360	J	3	YB142__GA__J__y__T
	YB145	OQ248183	OQ267059	OQ267210	OQ267361	J	1	YB145__GD__J__y__T
	FA648	OQ248184	OQ267060	OQ267211	OQ267362	L	3	FA648__CO__L__y__T
	YB150	OQ248185	OQ267061	OQ267212	OQ267363	J	3	YB150__GB__J__y__T
	YB031	OQ248186	OQ267062	OQ267213	OQ267364	J	1	YB031__GE__J__y__T
	YB033	OQ248187	OQ267063	OQ267214	OQ267365	P	4	YB033__GI__P__y__T
	FA806	OQ248188	OQ267064	OQ267215	OQ267366	L	3	FA806__IB__L__y__T
	YB043	OQ248189	OQ267065	OQ267216	OQ267367	J	3	YB043__GE__J__y__T
	YB063	OQ248190	OQ267066	OQ267217	OQ267368	P	1	YB063__GI__P__y__T
	YB069	OQ248191	OQ267067	OQ267218	OQ267369	J	5	YB069__GE__J__y__T
	YB070	OQ248192	OQ267068	OQ267219	OQ267370	P	1	YB070__GH__P__y__T
	YB086	OQ248193	OQ267069	OQ267220	OQ267371	J	2	YB086__GB__J__y__T
	YB089	OQ248194	OQ267070	OQ267221	OQ267372	P	1	YB089__GH__P__y__T
	YB094	OQ248195	OQ267071	OQ267222	OQ267373	J	2	YB094__GD__J__y__T
	ZA106	OQ248196	OQ267072	OQ267223	OQ267374	P	4	ZA106__BN__P__y__T
	ZA107	OQ248197	OQ267073	OQ267224	OQ267375	P	4	ZA107__BP__P__y__T
	ZA127	OQ248198	OQ267074	OQ267225	OQ267376	P	4	ZA127__BP__P__y__T
	WA070	OQ248199	OQ267075	OQ267226	OQ267377	J	1	WA070__HH__J__y__T
	ZA257	OQ248200	OQ267076	OQ267227	OQ267378	R	2	ZA257__BU__R__y__T
	ZA259	OQ248201	OQ267077	OQ267228	OQ267379	R	2	ZA259__BR__R__n__T
	ZA261	OQ248202	OQ267078	OQ267229	OQ267380	P	3	ZA261__BN__P__y__T
	ZA027	OQ248203	OQ267079	OQ267230	OQ267381	R	1	ZA027__BS__R__n__T
	ZA029	OQ248204	OQ267080	OQ267231	OQ267382	R	2	ZA029__BQ__R__y__T
	ZA046	OQ248205	OQ267081	OQ267232	OQ267383	R	4	ZA046__BQ__R__y__T
	ZA049	OQ248206	OQ267082	OQ267233	OQ267384	P	4	ZA049__BO__P__y__T
	ZA069	OQ248207	OQ267083	OQ267234	OQ267385	P	5	ZA069__BO__P__y__T
